# Supplementary material for: Middle atmosphere water vapour and dynamical features in aircraft measurements and ECMWF analyses
Source: Copernicus journal article supplement (doi:10.5194/acp-7-5291-2007), 2007-10-15
Supplement: Supplementary file 1 [file acp-7-5291-2007-supplement.pdf]

Middle atmosphere water vapour and dynamical  
features in aircraft measurements and ECMWF  
analyses:  
supplement figures

D. G. Feist, A. J. Geer, S. Müller, N. Kämpfer

July 4, 2007

This document provides additional figures that are not discussed in the main document but are still useful for the interpretation of the AMSOS data set.

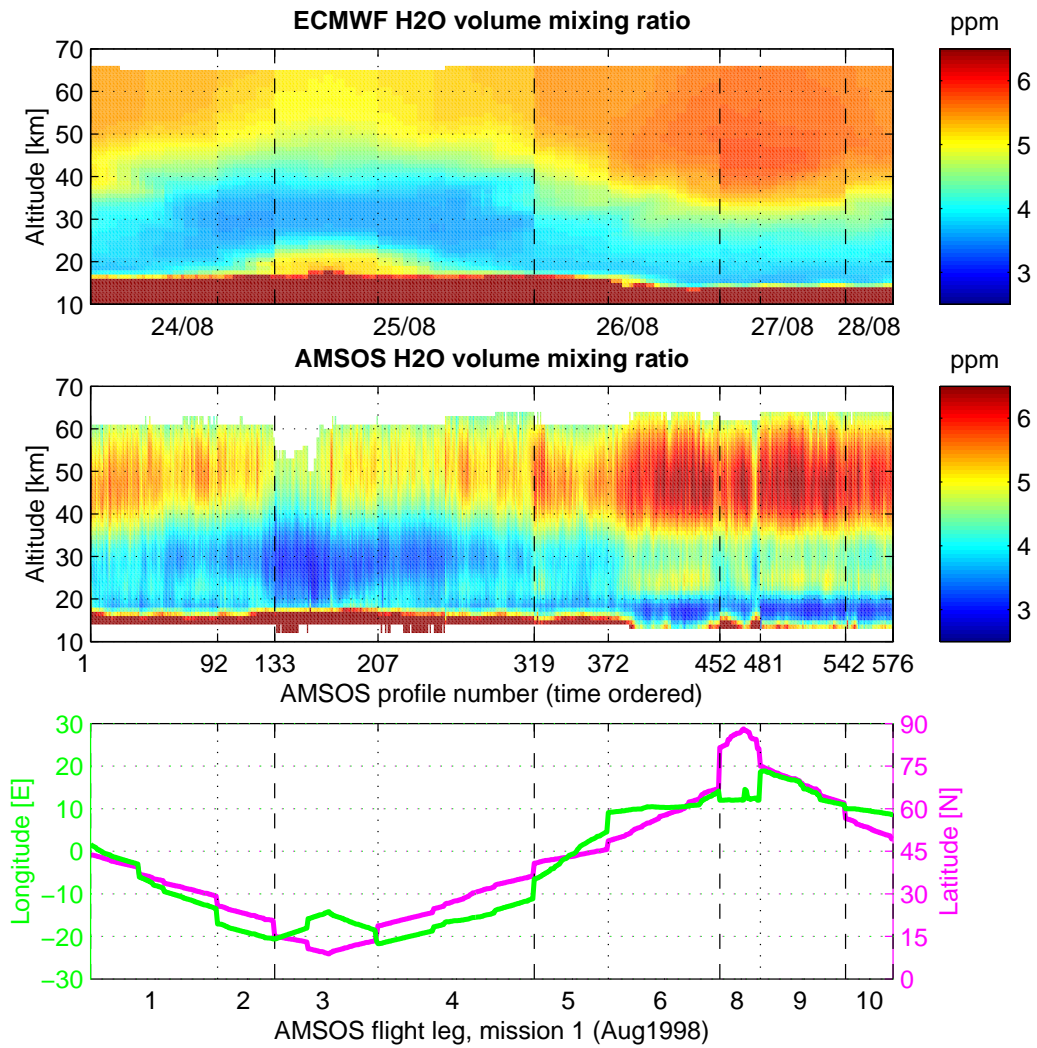

Figure 1: Overview of the complete AMSOS Mission 1 (August 24-28, 1998). The top plot shows ECMWF ERA-40 humidity profiles that correspond to the measured AMSOS profiles in the centre plot. The bottom plot shows the position of the measurements. The AMSOS profiles are ordered by time and numbered. Measurements from different days are separated by vertical dashed lines, while dotted lines separate different flight legs.

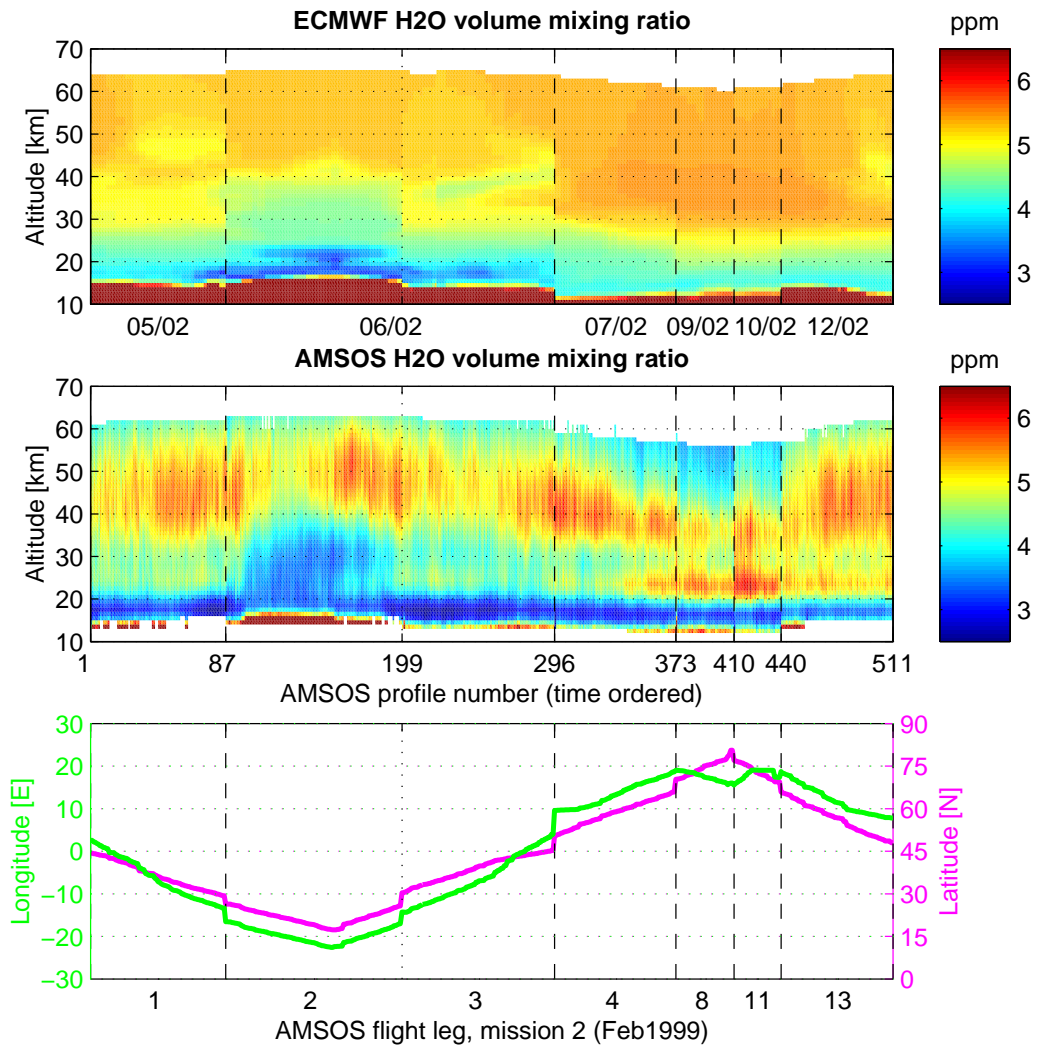

Figure 2: Overview of the complete AMSOS Mission 2 (February 5-12, 1999). The top plot shows ECMWF ERA-40 humidity profiles that correspond to the measured AMSOS profiles in the centre plot. The bottom plot shows the position of the measurements. The AMSOS profiles are ordered by time and numbered. Measurements from different days are separated by vertical dashed lines, while dotted lines separate different flight legs.

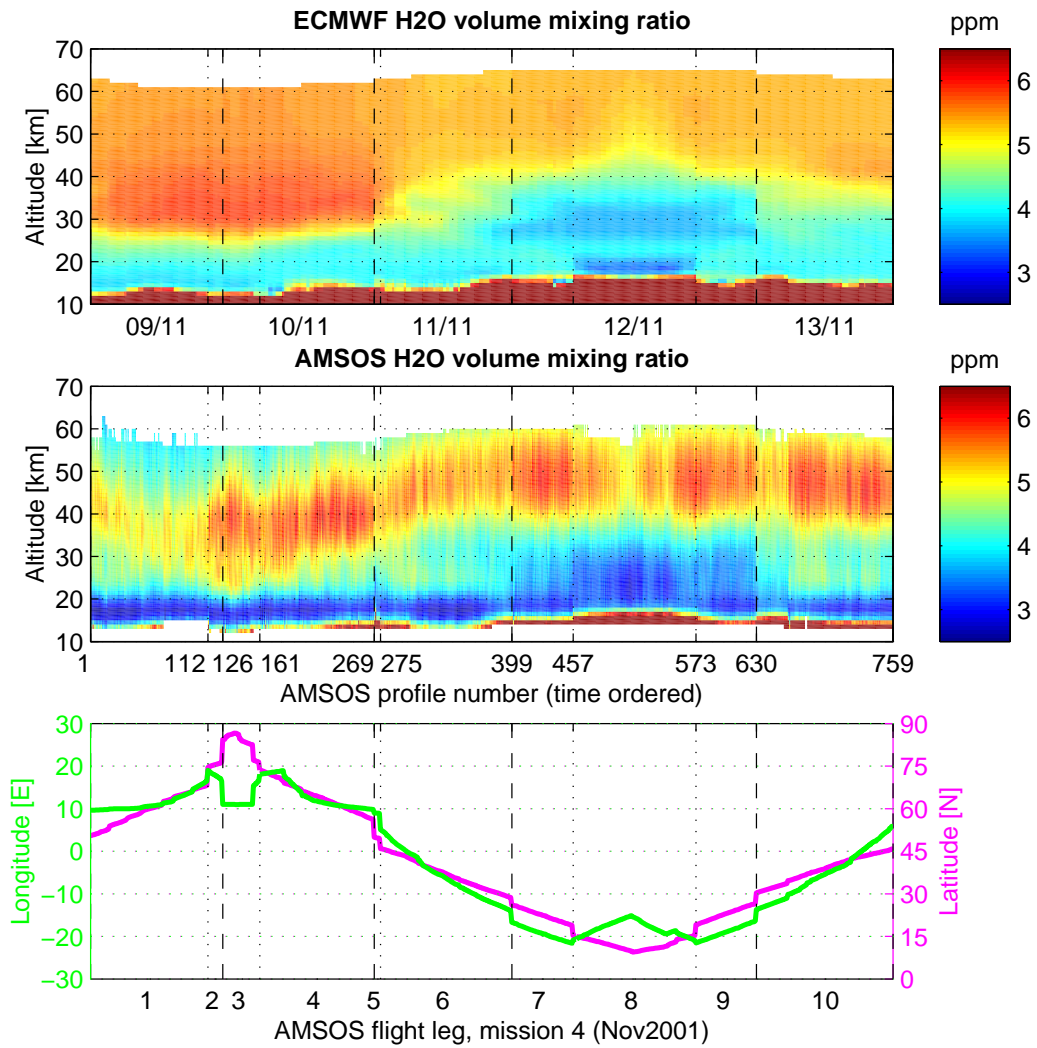

Figure 3: Overview of the complete AMSOS Mission 4 (November 9-13, 2001). The top plot shows ECMWF ERA-40 humidity profiles that correspond to the measured AMSOS profiles in the centre plot. The bottom plot shows the position of the measurements. The AMSOS profiles are ordered by time and numbered. Measurements from different days are separated by vertical dashed lines, while dotted lines separate different flight legs.
